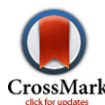

## Correction

# Correction: Association between Carotid Plaque Characteristics and Cerebral White Matter Lesions: One-Year Follow-Up Study by MRI

## The PLOS ONE Staff

In Table 1, “ $6.52 \pm 8.17$  (0.23–29.72) mm<sup>3</sup>” should be “ $6.52 \pm 8.17$  (0.23–29.72) ml” and “ $6.97 \pm 8.88$  (0.17–32.02) mm<sup>3</sup>” should be “ $6.97 \pm 8.88$  (0.17–32.02) ml”. Please note that in Table 1, total plaque volume and mean LRNC are correctly expressed in mm<sup>3</sup>. The authors have provided a corrected version of Table 1 here.

Throughout the article, Figure 3A-D (x and y-axis) and 3E-H (y-axis) “mm<sup>3</sup>” should be “ml”. Please view the corrected version of Figure 3 below.

**Table 1. Patient characteristics (n = 50).**

|                                                    |                                            |
|----------------------------------------------------|--------------------------------------------|
| Sex (male : female)                                | 30 : 20                                    |
| Mean age (range)                                   | 67.7±9.9 (47-87) years                     |
| Patients with hypertension                         | 42                                         |
| Patients with diabetes mellitus                    | 10                                         |
| Smoking habits                                     |                                            |
| Never smokers                                      | 18                                         |
| Former smokers                                     | 25                                         |
| Current smokers                                    | 7                                          |
| Mean total plaque volume (range)                   | 943.3±286.0 (458.5-2000.6) mm <sup>3</sup> |
| Mean LRNC volume (range)                           | 96.5±147.44 (0-557.2) mm <sup>3</sup>      |
| FC status                                          |                                            |
| Thick and intact                                   | 29                                         |
| Thin and/or ruptured                               | 21                                         |
| IPH present                                        | 16                                         |
| Mean ipsilateral WML volume at baseline (range)    | 6.52±8.17 (0.23-29.72) ml                  |
| Mean ipsilateral WML volume after one year (range) | 6.97±8.88 (0.17-32.02) ml                  |

doi:10.1371/journal.pone.0017070.t001

**Citation:** The PLOS ONE Staff (2014) Correction: Association between Carotid Plaque Characteristics and Cerebral White Matter Lesions: One-Year Follow-Up Study by MRI. PLoS ONE 9(7): e103924. doi:10.1371/journal.pone.0103924

**Published:** July 30, 2014

**Copyright:** © 2014 The PLOS ONE Staff. This is an open-access article distributed under the terms of the Creative Commons Attribution License, which permits unrestricted use, distribution, and reproduction in any medium, provided the original author and source are credited.

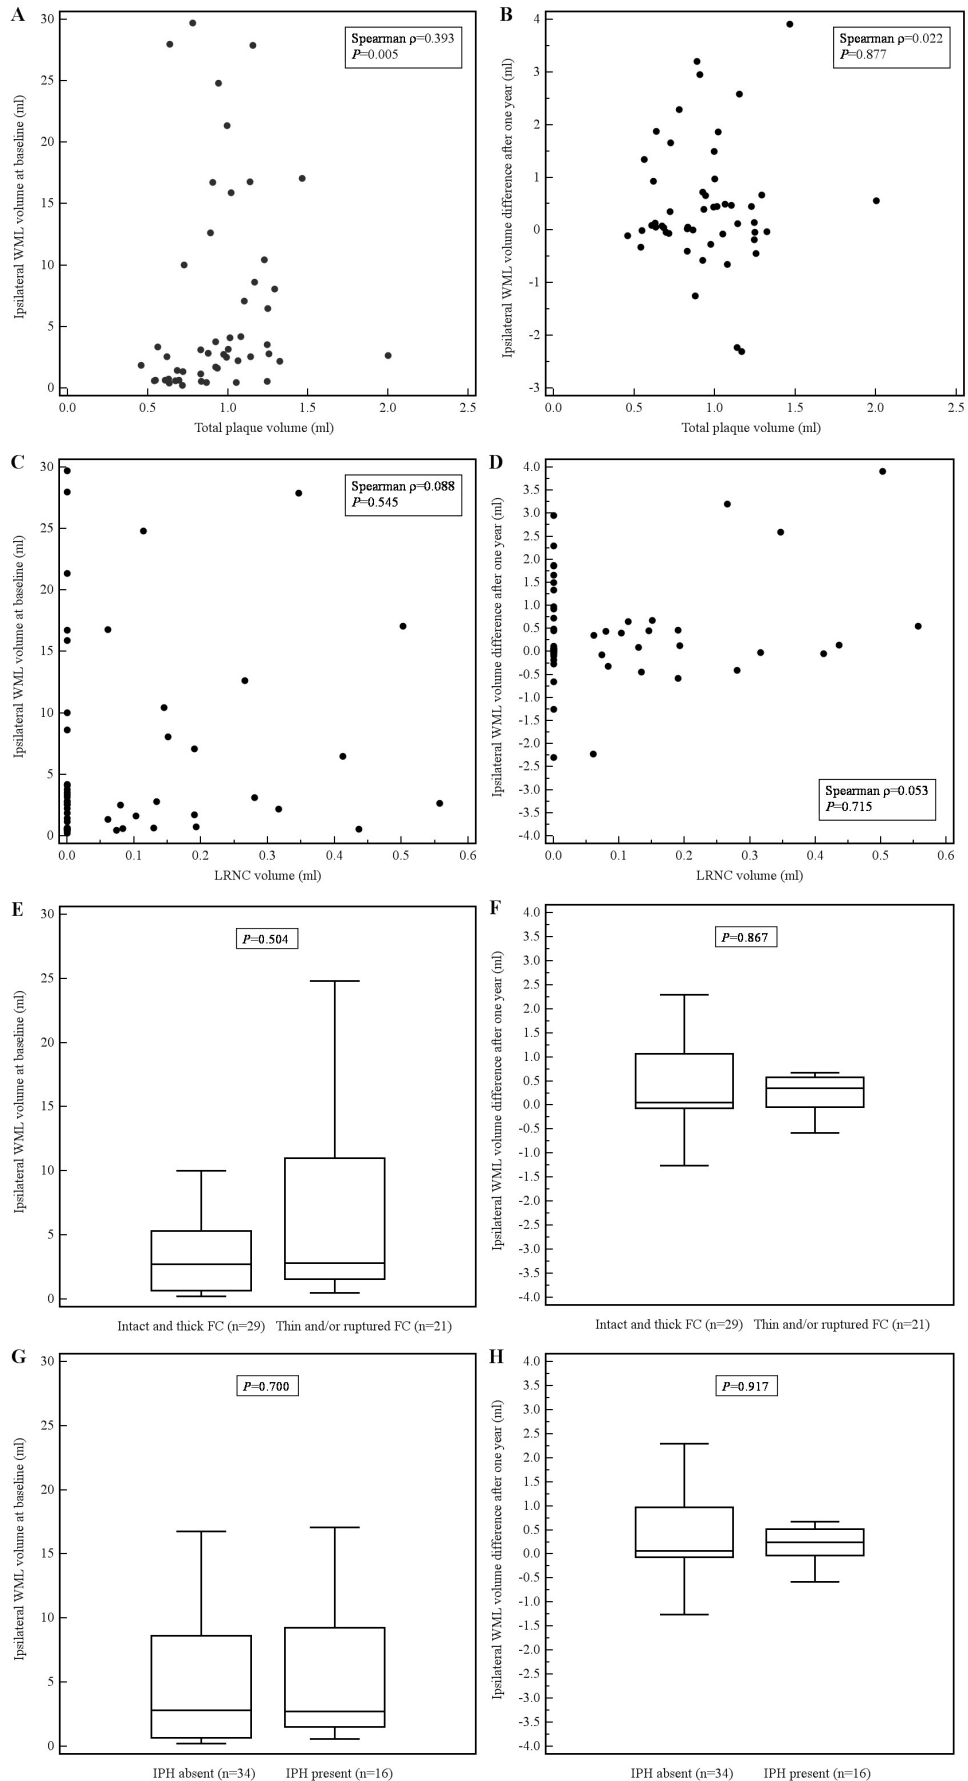

**Figure 3. Scatter plots showing the relation between total plaque volume and ipsilateral WML volume at baseline (A) and ipsilateral WML volume difference after one year (B); and between LRNC volume and ipsilateral WML volume at baseline (C) and ipsilateral WML volume difference after one year (D).** Box-and-Whisker plots showing the relation between fibrous cap status and WML volume at baseline (E) and WML volume difference after one year (F). Box-and-Whisker plots showing the relation between intraplaque hemorrhage and WML volume at baseline (G) and WML volume difference after one year (H).  
doi:10.1371/journal.pone.0017070.g003

## Reference

1. Kwee RM, Hofman PAM, Gronenschild EHBM, van Oostenbrugge RJ, Mess WH, et al. (2011) Association between Carotid Plaque Characteristics and Cerebral White Matter Lesions: One-Year Follow-Up Study by MRI. *PLoS ONE* 6(2): e17070. doi:10.1371/journal.pone.0017070
